# Supplementary material
Source: PubMed Central journal article supplement (PMC4505210)
Supplement: AAC.05064-14_zac008154192so1.pdf [file AAC.05064-14_zac008154192so1.pdf]

**Table S1.** Oligonucleotide primers used in this study and description of regions amplified.

| Description                                              | Gene/region amplified              | Primer designation                                      | Sequence (5'→3') <sup>a</sup>                     | Amplicon size (bp)                       |
|----------------------------------------------------------|------------------------------------|---------------------------------------------------------|---------------------------------------------------|------------------------------------------|
| <i>ccrAm2/Bm2</i> of <i>SCCmec</i> <sub>KM45013</sub>    | <i>ccrAm2</i>                      | <i>ccrAm2</i> -fw<br><i>ccrAm2</i> -rv                  | TTCKTCCAGAACCGATATCA<br>GGCAGCGTTCATTTAAWCSY      | 797 <sup>b</sup>                         |
|                                                          | <i>ccrBm2</i>                      | <i>ccrBm2</i> -fw<br><i>ccrBm2</i> -rv                  | GACGGCAAGCATACTCCAAT<br>GCAGTGCTTCCTCTGGTTSK      | 808 <sup>b</sup>                         |
| <i>mec</i> complex of <i>SCCmec</i> <sub>KM45013</sub>   | <i>mecB</i>                        | <i>mecB</i> -fw<br><i>mecB</i> -rv                      | TGTTCCGGCATTTCGACGAA<br>TCTCCCTGGCCATATCCTGA      | 469 <sup>b</sup>                         |
|                                                          | <i>mecIm</i>                       | <i>mecIm</i> -fw<br><i>mecIm</i> -rv                    | TGAGGCATTGAGTGCTAAACA<br>TTCGGTCAATTCTTCAGGTG     | 265 <sup>b</sup>                         |
|                                                          | <i>mecR1m</i>                      | <i>mecRm</i> -fw<br><i>mecRm</i> -rv                    | CAGCTTGTGACATGGAAGTGA<br>TACCAGTTTTTCCCCACAKC     | 861 <sup>b</sup>                         |
|                                                          | <i>blaZm</i>                       | <i>blaZm</i> -fw<br><i>blaZm</i> -rv                    | AAGTACAATATTCAAGCGGGTGT<br>AATTAGCTCCCTGCCCACTT   | 586 <sup>b</sup>                         |
| <i>orfX</i> of strain KM45013                            | <i>orfX</i>                        | <i>orfX</i> _KM-fw<br><i>orfX</i> _KM-rv                | GAAGCGGAGCGCATACTATC<br>GCATAGTTTGAGCGGTCCAT      | 197 <sup>b</sup>                         |
| Transposase gene of <i>Tn6045</i>                        | <i>tnp</i>                         | <i>tnp</i> -rv_096<br><i>tnp</i> -fw_096                | CGCCACAGGCGTTAAATAAT<br>GCTCCGAAAATTGCGTAAAG      | 906 <sup>b</sup>                         |
| MCCL_0033                                                | MCCL_0033                          | MCCL_0033_096-fw<br>MCCL_0033_096-rv                    | GCTGGAAAACGAAAGAAGCTG<br>ACCCATAGCTCGCACAAAAT     | 413 <sup>b</sup>                         |
| MCCL_0034                                                | MCCL_0034                          | MCCL_0034_096-fw<br>MCCL_0034_096-rv                    | AAAATGGATGCTGAGGGTGA<br>TCCACCAATTTCTTGTGCTG      | 339 <sup>b</sup>                         |
| Restriction analysis of <i>SCCmec</i> <sub>KM45013</sub> | Joining region 3 (J3)              | <i>orfX</i> _KM-fw<br><i>ccrAm2</i> -fw                 | GAAGCGGAGCGCATACTATC<br>TTCKTCCAGAACCGATATCA      | 10,740 <sup>c</sup>                      |
|                                                          | 5' end J2                          | <i>ccrAm2</i> -rv<br>C16_ISP2                           | GGCAGCGTTCATTTAAWCSY<br>ACAGGTACGCCTGCTTCTGT      | 11,777 <sup>c</sup>                      |
|                                                          | 3' end J2 + <i>mec</i> operon      | C16_ISP3<br><i>blaZm</i> -rv                            | AGCAGGCGTACCTGTTGAGT<br>AATTAGCTCCCTGCCCACTT      | 17,074 <sup>c</sup>                      |
| <i>SCCmec</i> <sub>KM45013</sub> CIs and UCS             | <i>SCCmec</i> <sub>KM45013</sub>   | <i>SCCmec</i> 5'_inv (1)<br><i>SCCmec</i> 3'_inv (4, C) | TCCCACTGATTCTGCCTTTT<br>GGTGATAAAAAGTGGGCAAGG     | 688 <sup>c</sup>                         |
|                                                          | <i>SCC</i> <sub>KM45013</sub>      | <i>SCCmec</i> 5'_inv (1)<br>ISS2-up (2)                 | TCCCACTGATTCTGCCTTTT<br>CCCCTAGAAAAAGCGGATG       | 989 <sup>c</sup>                         |
|                                                          | ψ <i>SCCmec</i> <sub>KM45013</sub> | ISS2-dn (3)<br><i>SCCmec</i> 3'_inv (4, C)              | AACCCAAATTCAACCATATGATAA<br>GGTGATAAAAAGTGGGCAAGG | 547 <sup>c</sup>                         |
|                                                          | UCS                                | <i>mecIm</i> -fw (B)<br><i>SCCmec</i> 3'_inv (4, C)     | TGAGGCATTGAGTGCTAAACA<br>GGTGATAAAAAGTGGGCAAGG    | 1,702 <sup>c</sup>                       |
| Detection of chromosomal regions after excision          | <i>SCCmec</i> <sub>KM45013</sub>   | <i>orfX</i> -fw2 (0)<br><i>orf52</i> _inv (5, D)        | CGCTCAAACCTATGCCCTCTC<br>GTTTGGCCTTTATGGGCTTT     | 1,744 <sup>c</sup> / 40,405 <sup>c</sup> |
|                                                          | <i>SCC</i> <sub>KM45013</sub>      | <i>orfX</i> -fw2 (0)<br>ISS2-dn (3)                     | CGCTCAAACCTATGCCCTCTC<br>AACCCAAATTCAACCATATGATAA | 369 <sup>c</sup> / 27,245 <sup>c</sup>   |
|                                                          | ψ <i>SCCmec</i> <sub>KM45013</sub> | ISS2-up (2)<br><i>orf52</i> _inv (5, D)                 | CCCCTAGAAAAAGCGGATG<br>GTTTGGCCTTTATGGGCTTT       | 2,029 <sup>c</sup> / 14,087 <sup>c</sup> |
|                                                          | UCS                                | <i>orf45</i> _inv (A)<br><i>orf52</i> _inv (5, D)       | CACTGAATCAGCATGATGTCCT<br>GTTTGGCCTTTATGGGCTTT    | 1,535 <sup>d</sup> / 7,814 <sup>c</sup>  |

<sup>a</sup> Specifications for degenerate primer: K (T or G), Y (T or C), R (G or A), W (A or T), S (G or C), or M (A or C).<sup>b</sup> Taq DNA polymerase was used following the manufacturer's recommendations (Solis BioDyne).<sup>c</sup> GoTaq DNA polymerase was used following the manufacturer's recommendations (Promega).<sup>d</sup> HOT FIREPol DNA polymerase was used following the manufacturer's recommendations (Solis BioDyne).
